# Supplementary material for: The effectiveness of Bacopamonnieri (Linn.) Wettst. as a nootropic, neuroprotective, or antidepressant supplement: analysis of the available clinical data
Source: PubMed Central journal article supplement (PMC7803732; doi:10.1038/s41598-020-80045-2), 2021-01-12

The effectiveness of *Bacopa monnieri* (Linn.) *Wettst.* as a nootropic, neuroprotective, or antidepressant supplement: Analysis of the available clinical data.

James M. Brimson, Sirikalaya Brimson, Mani Iyer Prasanth, Premrutai Thitilertdecha, Dicson Sheeja Malar, Tewin Tencomnao.

**Supplementary Figure 2.** The meta-analysis of neuropsychological tests carried out on healthy patients treated with *B. monnieri* or placebo. Forest plots and funnel plots along with the full data analysis

### AVLT Delayed Recall

Random-Effects Model (k = 4)

|           | Estimate | se    | Z    | p     | CI Lower Bound | CI Upper Bound |
|-----------|----------|-------|------|-------|----------------|----------------|
| Intercept | 0.845    | 0.543 | 1.56 | 0.120 | -0.219         | 1.910          |

Note. Tau<sup>2</sup> Estimator: DerSimonian-Laird

Heterogeneity Statistics

| Tau   | Tau <sup>2</sup>    | I <sup>2</sup> | H <sup>2</sup> | R <sup>2</sup> | df    | Q      | p      |
|-------|---------------------|----------------|----------------|----------------|-------|--------|--------|
| 1.041 | 1.0638 (SE= 1.0106) | 93.08%         | 14.444         |                | 3.000 | 43.332 | < .001 |

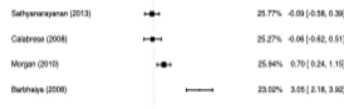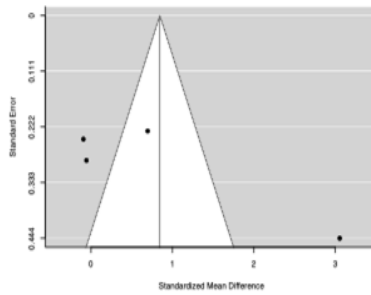

### AVLT Learning Rate

Random-Effects Model (k = 4)

|           | Estimate | se    | Z    | p     | CI Lower Bound | CI Upper Bound |
|-----------|----------|-------|------|-------|----------------|----------------|
| Intercept | 0.497    | 0.338 | 1.47 | 0.142 | -0.166         | 1.159          |

Note. Tau<sup>2</sup> Estimator: DerSimonian-Laird

Heterogeneity Statistics

| Tau   | Tau <sup>2</sup>   | I <sup>2</sup> | H <sup>2</sup> | R <sup>2</sup> | df    | Q      | p      |
|-------|--------------------|----------------|----------------|----------------|-------|--------|--------|
| 0.615 | 0.3778 (SE= 0.379) | 83.53%         | 6.070          |                | 3.000 | 18.211 | < .001 |

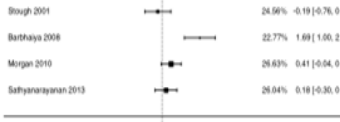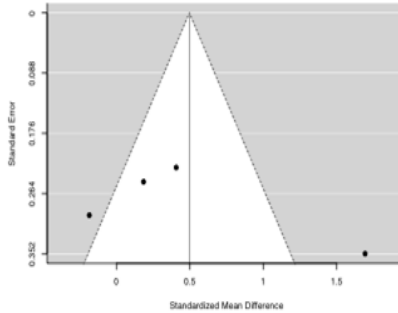

### AVLT Forgetting rate

Random-Effects Model (k = 3)

|           | Estimate | se    | Z      | p     | CI Lower Bound | CI Upper Bound |
|-----------|----------|-------|--------|-------|----------------|----------------|
| Intercept | -0.0272  | 0.145 | -0.188 | 0.851 | -0.311         | 0.256          |

Note. Tau<sup>2</sup> Estimator: DerSimonian-Laird

Heterogeneity Statistics

| Tau   | Tau <sup>2</sup> | I <sup>2</sup> | H <sup>2</sup> | R <sup>2</sup> | df    | Q     | p     |
|-------|------------------|----------------|----------------|----------------|-------|-------|-------|
| 0.000 | 0 (SE= 0.0644)   | 0%             | 1.000          |                | 2.000 | 1.584 | 0.453 |

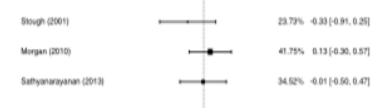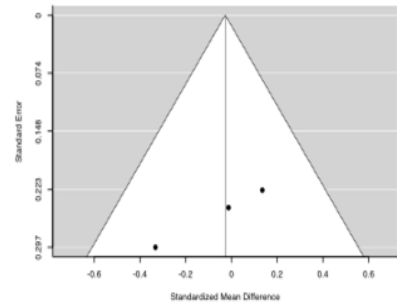

### AVLT Proactive interference

Random-Effects Model (k = 3)

|           | Estimate | se    | Z    | p     | CI Lower Bound | CI Upper Bound |
|-----------|----------|-------|------|-------|----------------|----------------|
| Intercept | 0.620    | 0.343 | 1.81 | 0.071 | -0.052         | 1.292          |

Note. Tau<sup>2</sup> Estimator: DerSimonian-Laird

Heterogeneity Statistics

| Tau   | Tau <sup>2</sup>   | I <sup>2</sup> | H <sup>2</sup> | R <sup>2</sup> | df    | Q      | p     |
|-------|--------------------|----------------|----------------|----------------|-------|--------|-------|
| 0.532 | 0.283 (SE= 0.3548) | 80.41%         | 5.106          |                | 2.000 | 10.212 | 0.006 |

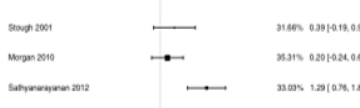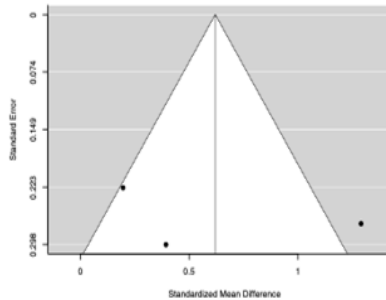

### AVLT Retroactive Interference

Random-Effects Model (k = 3)

|           | Estimate | se    | Z      | p     | CI Lower Bound | CI Upper Bound |
|-----------|----------|-------|--------|-------|----------------|----------------|
| Intercept | -0.129   | 0.225 | -0.575 | 0.565 | -0.571         | 0.312          |

Note. Tau<sup>2</sup> Estimator: DerSimonian-Laird

Heterogeneity Statistics

| Tau   | Tau <sup>2</sup>    | I <sup>2</sup> | H <sup>2</sup> | R <sup>2</sup> | df    | Q     | p     |
|-------|---------------------|----------------|----------------|----------------|-------|-------|-------|
| 0.294 | 0.0867 (SE= 0.1624) | 57.17%         | 2.335          |                | 2.000 | 4.669 | 0.097 |

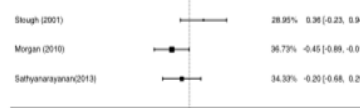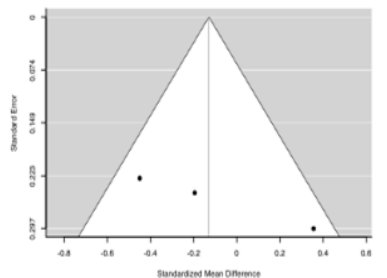

### Digit span Forwards

Random-Effects Model (k = 5)

|           | Estimate | se    | Z     | p     | CI Lower Bound | CI Upper Bound |
|-----------|----------|-------|-------|-------|----------------|----------------|
| Intercept | 0.0710   | 0.444 | 0.160 | 0.873 | -0.799         | 0.941          |

Note. Tau<sup>2</sup> Estimator: DerSimonian-Laird

Heterogeneity Statistics

| Tau   | Tau <sup>2</sup>    | I <sup>2</sup> | H <sup>2</sup> | R <sup>2</sup> | df    | Q      | p      |
|-------|---------------------|----------------|----------------|----------------|-------|--------|--------|
| 0.940 | 0.8841 (SE= 0.7133) | 90.28%         | 10.287         |                | 4.000 | 41.147 | < .001 |

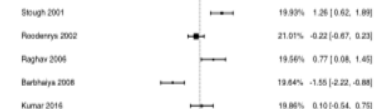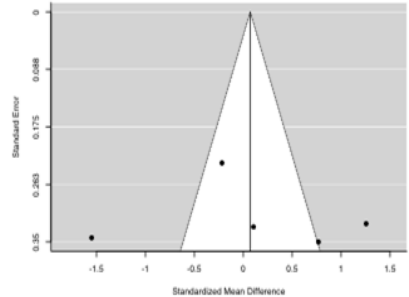

### Digit Span Reverse

Random-Effects Model (k = 5)

|           | Estimate | se    | Z      | p     | CI Lower Bound | CI Upper Bound |
|-----------|----------|-------|--------|-------|----------------|----------------|
| Intercept | -0.0375  | 0.285 | -0.132 | 0.895 | -0.595         | 0.520          |

Note. Tau<sup>2</sup> Estimator: DerSimonian-Laird

Heterogeneity Statistics

| Tau   | Tau <sup>2</sup>    | I <sup>2</sup> | H <sup>2</sup> | R <sup>2</sup> | df    | Q      | p     |
|-------|---------------------|----------------|----------------|----------------|-------|--------|-------|
| 0.560 | 0.3142 (SE= 0.2894) | 78.19%         | 4.585          | .              | 4.000 | 18.341 | 0.001 |

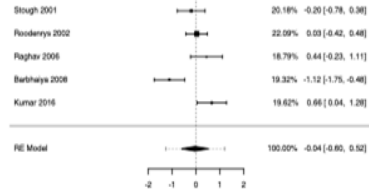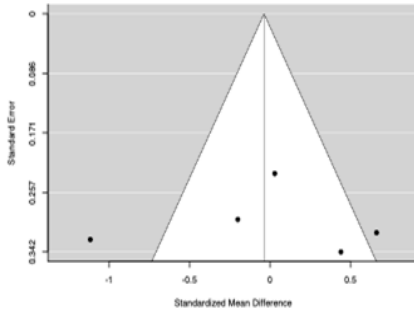

### Paired associate learning

Random-Effects Model (k = 3)

|           | Estimate | se    | Z    | p     | CI Lower Bound | CI Upper Bound |
|-----------|----------|-------|------|-------|----------------|----------------|
| Intercept | 0.308    | 0.210 | 1.47 | 0.143 | -0.104         | 0.719          |

Note. Tau<sup>2</sup> Estimator: DerSimonian-Laird

Heterogeneity Statistics

| Tau   | Tau <sup>2</sup>    | I <sup>2</sup> | H <sup>2</sup> | R <sup>2</sup> | df    | Q     | p     |
|-------|---------------------|----------------|----------------|----------------|-------|-------|-------|
| 0.163 | 0.0264 (SE= 0.1327) | 19.9%          | 1.248          | .              | 2.000 | 2.497 | 0.287 |

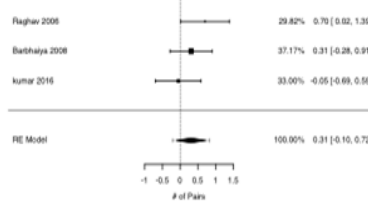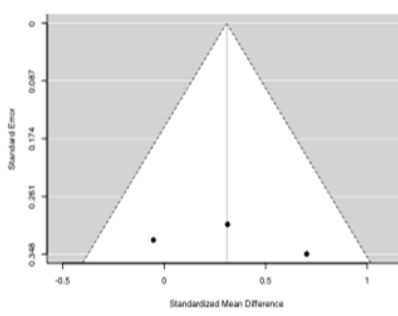

### Simple Reaction time

Random-Effects Model (k = 3)

|           | Estimate | se    | Z    | p     | CI Lower Bound | CI Upper Bound |
|-----------|----------|-------|------|-------|----------------|----------------|
| Intercept | 0.308    | 0.210 | 1.47 | 0.143 | -0.104         | 0.719          |

Note. Tau<sup>2</sup> Estimator: DerSimonian-Laird

Heterogeneity Statistics

| Tau   | Tau <sup>2</sup>    | I <sup>2</sup> | H <sup>2</sup> | R <sup>2</sup> | df    | Q     | p     |
|-------|---------------------|----------------|----------------|----------------|-------|-------|-------|
| 0.163 | 0.0264 (SE= 0.1327) | 19.9%          | 1.248          | .              | 2.000 | 2.497 | 0.287 |

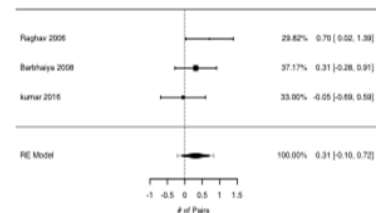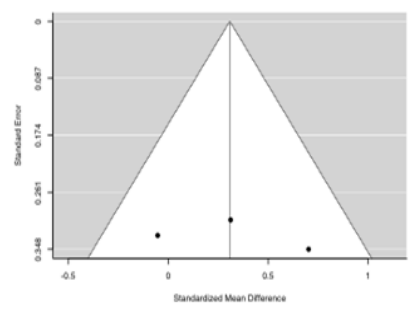

### Choice Reaction Time

Random-Effects Model (k = 4)

|           | Estimate | se    | Z     | p     | CI Lower Bound | CI Upper Bound |
|-----------|----------|-------|-------|-------|----------------|----------------|
| Intercept | -0.199   | 0.148 | -1.34 | 0.179 | -0.490         | 0.092          |

Note. Tau<sup>2</sup> Estimator: DerSimonian-Laird

Heterogeneity Statistics

| Tau   | Tau <sup>2</sup> | I <sup>2</sup> | H <sup>2</sup> | R <sup>2</sup> | df    | Q     | p     |
|-------|------------------|----------------|----------------|----------------|-------|-------|-------|
| 0.000 | 0 (SE= 0.0728)   | 0%             | 1.000          | .              | 3.000 | 2.269 | 0.518 |

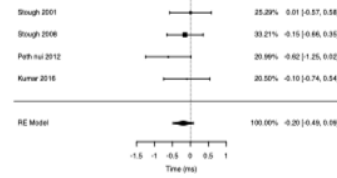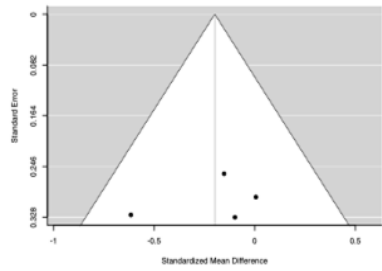

### Logical Memory

Random-Effects Model (k = 3)

|           | Estimate | se    | Z    | p     | CI Lower Bound | CI Upper Bound |
|-----------|----------|-------|------|-------|----------------|----------------|
| Intercept | 1.11     | 0.349 | 3.18 | 0.001 | 0.425          | 1.795          |

Note. Tau<sup>2</sup> Estimator: DerSimonian-Laird

Heterogeneity Statistics

| Tau   | Tau <sup>2</sup>    | I <sup>2</sup> | H <sup>2</sup> | R <sup>2</sup> | df    | Q     | p     |
|-------|---------------------|----------------|----------------|----------------|-------|-------|-------|
| 0.517 | 0.2669 (SE= 0.3677) | 73.23%         | 3.735          | .              | 2.000 | 7.470 | 0.024 |

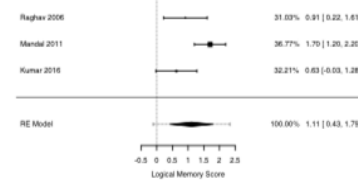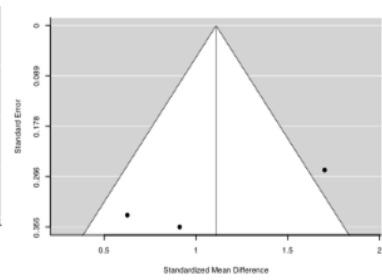

Supplement: 41598_2020_80045_MOESM2_ESM.pdf [file 41598_2020_80045_MOESM2_ESM.pdf]
