# Supplementary material for: The effectiveness of Bacopamonnieri (Linn.) Wettst. as a nootropic, neuroprotective, or antidepressant supplement: analysis of the available clinical data
Source: PubMed Central journal article supplement (PMC7803732; doi:10.1038/s41598-020-80045-2), 2021-01-12
Supplement: 41598_2020_80045_MOESM1_ESM.pdf [file 41598_2020_80045_MOESM1_ESM.pdf]

The effectiveness of *Bacopa monnieri* (Linn.) *Wettst.* as a nootropic, neuroprotective, or antidepressant supplement: Analysis of the available clinical data.

James M. Brimson, Sirikalaya Brimson, Mani Iyer Prasanth, Premrutai Thitilertdecha, Dicson Sheeja Malar, Tewin Tencomnao.

**Supplementary Table 1. The literature summarized within this analysis before excluding polyherbal formulations and acute studies**

| Formulation (Dose used)                                          | Candidates per group (n)      | Study type                                                                                                       | Results and statistically significant outcomes (P<0.01)                                                 | Reference |
|------------------------------------------------------------------|-------------------------------|------------------------------------------------------------------------------------------------------------------|---------------------------------------------------------------------------------------------------------|-----------|
| KeenMind (300-450 mg/day)                                        | KeenMind n=37<br>Placebo n=39 | Randomized, double-blind, placebo-controlled; memory in middle-aged otherwise healthy people                     | No significant outcomes at P<0.01 from 11 tests                                                         | 1         |
| KeenMind (300 mg/day)                                            | KeenMind n=23<br>Placebo n=23 | Randomized, double-blind, placebo-controlled; memory in young to middle-aged, otherwise healthy people           | Reduction in anxiety. No significant outcomes at P<0.01 from 15 other tests                             | 2         |
| KeenMind (320 or 640 mg/day)                                     | KeenMind n=20<br>Placebo n=20 | Randomized, double-blind, placebo-controlled: memory in otherwise healthy people over 55 years old               | No significant outcomes at P<0.01 from 7 types of test                                                  | 3         |
| Dried <i>B. monnieri</i> extract (300 mg/day)                    | Bacopa n=24<br>Placebo n=24   | Randomized, double-blind, placebo-controlled; memory, anxiety and depression in otherwise healthy elderly people | Improvements in delayed recall and Stroop test. Not significant in 3 other tests                        | 4         |
| KeenMind (300 mg/day)                                            | KeenMind n=29<br>Placebo n=32 | Randomized, double-blind, placebo-controlled; memory in young to middle-aged, otherwise healthy people           | No significant outcomes at P<0.01 from 19 tests                                                         | 5         |
| BacoMind (450 mg/day)                                            | BacoMind n=23<br>Placebo n=21 | Randomized, double-blind, placebo-controlled; memory in otherwise healthy elderly people                         | Improvements in digit-span backwards, & list learning-delayed recall. Not significant in 21 other tests | 6         |
| BacoMind (300 mg/day)                                            | BacoMind n=49<br>Placebo n=49 | Randomized, double-blind, placebo-controlled; memory in otherwise healthy elderly people                         | Improvements in AVLT and AVLT delayed recall.<br>Not significant in 11 other tests                      | 7         |
| Extract <i>B. monnieri</i> whole plant (100 mg) powder <i>B.</i> | Bacopa n=41                   | Randomized, placebo controlled in healthy                                                                        | No significant outcomes at P<0.01 from 3 tests                                                          | 8         |

|                                                                                                                                                                                               |                                                                                                                          |                                                                                                                                  |                                                                                                                |               |
|-----------------------------------------------------------------------------------------------------------------------------------------------------------------------------------------------|--------------------------------------------------------------------------------------------------------------------------|----------------------------------------------------------------------------------------------------------------------------------|----------------------------------------------------------------------------------------------------------------|---------------|
| <i>monnieri</i> whole plant (650 mg)                                                                                                                                                          | Placebo <i>n</i> =43                                                                                                     | participants between the age of 30 and 42.                                                                                       |                                                                                                                |               |
| <i>B. monnieri</i> standardized tablet (300 or 600 mg)                                                                                                                                        | Bacopa 300 mg <i>n</i> =20<br>Bacopa 600 mg <i>n</i> =20<br>Placebo <i>n</i> =20                                         | Randomized, double-blind, placebo-controlled; memory in young to middle-aged, otherwise healthy people                           | Significant improvements in power of attention, continuity of attention, speed of memory and quality of memory | <sup>9</sup>  |
| BacoMind (450 mg/day)                                                                                                                                                                         | BacoMind <i>n</i> =33<br>Placebo <i>n</i> =33                                                                            | Randomized, double-blind, placebo-controlled; memory and anxiety in middle-aged otherwise healthy people                         | No significant outcomes at <i>P</i> <0.01 from 14 tests                                                        | <sup>10</sup> |
| <i>B. monnieri</i> , <i>H. rhamnoides</i> and <i>D. bulbifera</i> combined (500 mg/day)                                                                                                       | (normal patients)<br>Bacopa <i>n</i> =56<br>Placebo <i>n</i> =41 (SADT)<br>Donepezil <i>n</i> =43<br>Bacopa <i>n</i> =61 | Randomized, double-blind, placebo-controlled + standard drug (donepezil): memory and depression in Alzheimer's diseases patients | Improvements in MMSE, DSS, delayed recall, attention span and depression.                                      | <sup>11</sup> |
| Polyherbal formulation containing <i>B. monnieri</i> dry extract (320 mg), L-theanine (100 mg), <i>C. sativus</i> 30 mg, + vitamins and minerals                                              | Bacopa <i>n</i> =15<br>Placebo <i>n</i> =15                                                                              | Randomized, double-blind, placebo-controlled. Depression, memory and stress in elderly people with self-reported memory loss.    | No significant outcomes at <i>P</i> <0.01 from 3 types of test                                                 | <sup>12</sup> |
| <i>H. pluvialis</i> (74 mg)<br>Astaxanthin (2 mg)<br><i>B. monnieri</i> dry extract 20% (100 mg)<br>Bacosides (20 mg)<br>Phosphatidylserine (extracted from soy) (30 mg)<br>Vitamin E (30 mg) | Herbal supplement <i>n</i> =104                                                                                          | Non-comparative, exploratory clinical study on Alzheimer's patients.<br>Non-placebo-controlled                                   | Improvements in Das-cog, and clock drawing test                                                                | <sup>13</sup> |
| Bacognize (300 mg/day)                                                                                                                                                                        | Baconize <i>n</i> =39                                                                                                    | Alzheimer's disease patients. Open label, uncontrolled, non-randomized                                                           | Improvements in MMSES                                                                                          | <sup>14</sup> |
| Citalopram (40 mg) alone or Citalopram + <i>B. monnieri</i> (300 mg)                                                                                                                          | Citalopram <i>n</i> =23<br>Citalopram + Bacopa <i>n</i> =19                                                              | Randomized, comparison of anhedonia in patients with unsatisfactory results after 4 weeks of citalopram treatment                | Bacopa improved citalopram's effects in SHAPS, HAM-D and SDQ. <i>P</i> <0.05                                   | <sup>15</sup> |

|                                                                                                                                                     |                                                         |                                                                                                                           |                                                                                                                                                                   |    |
|-----------------------------------------------------------------------------------------------------------------------------------------------------|---------------------------------------------------------|---------------------------------------------------------------------------------------------------------------------------|-------------------------------------------------------------------------------------------------------------------------------------------------------------------|----|
| Mentat polyherbal formulation, 13 herb extracts including <i>B. monnieri</i> , (136 mg) and <i>C. asiatica</i> (70 mg), and 11 other powdered herbs | Placebo <i>n</i> =20<br>Mentat <i>n</i> =20             | Double-blind, placebo-controlled study; Behavior of children                                                              | No significant outcomes at $P<0.01$                                                                                                                               | 16 |
| Mentat polyherbal formulation, 13 herb extracts including <i>B. monnieri</i> , (136 mg) and <i>C. asiatica</i> 70 mg, and 11 other powdered herbs   | Placebo <i>n</i> =30<br>Mentat <i>n</i> =30             | Randomized, double-blind, placebo-controlled trial. Behavior in children with ADHD                                        | No significant outcomes at $P<0.01$                                                                                                                               | 17 |
| <i>B. monnieri</i> (300 mg; 215 mg) and <i>Ginkgo biloba</i> (120 mg; 260 mg)                                                                       | Bacopa/Ginko <i>n</i> =44<br>Placebo <i>n</i> =41       | Randomized, double-blind, placebo-controlled, cognitive performance in otherwise healthy young to middle-aged people.     | No significant outcomes at $P<0.01$ from 17 tests                                                                                                                 | 18 |
| BacoMind (300-450 mg/day)                                                                                                                           | BacoMind <i>n</i> =23                                   | Phase I safety study                                                                                                      | Mild adverse events related to gastrointestinal system                                                                                                            | 19 |
| Manas Niyamak Yoga. Polyherbal formulation including <i>B. monnieri</i> , <i>C. asiatica</i> , and others                                           | Placebo <i>n</i> =10<br>Manas Niyamak Yoga <i>n</i> =10 | Randomized, double-blind, placebo-controlled study, measuring ADHD in children                                            | Improvements in division of attention and reaction time                                                                                                           | 20 |
| Brahmi (250 mg) twice a day after meals                                                                                                             | Bacopa <i>n</i> =20<br>Caffeine <i>n</i> =20            | Randomized 40 healthy male medical student volunteers in the age group of $25 \pm 5$ years.<br><br>No placebo control     | Significant improvements in simple reaction time, multiple choice reaction time, digit cancellation task (DCT), mental arithmetic task (MAT) and memory test (MT) | 21 |
| Nurture & Clarity. Polyherbal formulation including <i>B. monnieri</i> , <i>Paeoniae alba</i> , and others                                          | Placebo <i>n</i> =40<br>Treatment <i>n</i> =80          | Randomized, double-blind, placebo-controlled trial. Measuring ADHD in children                                            | Improvements in response time and variability                                                                                                                     | 22 |
| Memomet polyherbal formulation: <i>B. monnieri</i> (125 mg), <i>C. pleuricaulis</i> (100 mg) and <i>C. asiatica</i> (100 mg).                       | Placebo <i>n</i> =30<br>Memomet <i>n</i> =56            | Randomized, double-blind, placebo-controlled trial. Behavior in children with ADHD                                        | No significant outcomes at $P<0.01$                                                                                                                               | 23 |
| KeenMind (320 or 640 mg/day)                                                                                                                        | Not reported                                            | Acute randomized, double-blind, placebo-controlled: mood anxiety and depression in otherwise healthy young to middle-aged | No significant outcomes at $P<0.01$ from 5 types of test                                                                                                          | 24 |

|                              |                  |                                                                                                                             |                                                                                                                                                             |    |
|------------------------------|------------------|-----------------------------------------------------------------------------------------------------------------------------|-------------------------------------------------------------------------------------------------------------------------------------------------------------|----|
| KeenMind (320 or 640 mg/day) | Not reported     | Acute randomized, double-blind, placebo-controlled, cognitive performance in otherwise healthy young to middle-aged people. | Improvements in reverse counting in 3s and 7s and improvements in stress.<br>No significant improvements in rapid visual information processing task (RVIP) | 25 |
| BacoMind (225 mg/day)        | BacoMind<br>n=24 | Open label study: ADHD in children                                                                                          | No significant outcomes at P<0.01                                                                                                                           | 26 |

## References

- 1 Roodenrys, S. *et al.* Chronic Effects of Brahmi (*Bacopa monnieri*) on Human Memory. *Neuropsychopharmacology* **27**, 279-281 (2002).
- 2 Stough, C. *et al.* The chronic effects of an extract of *Bacopa monniera* (Brahmi) on cognitive function in healthy human subjects. *Psychopharmacology* **156**, 481-484, doi:10.1007/s002130100815 (2001).
- 3 Raghav, S., Singh, H., Dalal, P. K., Srivastava, J. S. & Asthana, O. P. Randomized controlled trial of standardized *Bacopa monniera* extract in age-associated memory impairment. *Indian Journal of Psychiatry* **48**, 238-238, doi:10.4103/0019-5545.31555 (2006).
- 4 Calabrese, C. *et al.* Effects of a Standardized *Bacopa monnieri* Extract on Cognitive Performance, Anxiety, and Depression in the Elderly: A Randomized, Double-Blind, Placebo-Controlled Trial. *The Journal of Alternative and Complementary Medicine* **14**, 707-713, doi:10.1089/acm.2008.0018 (2008).
- 5 Stough, C. *et al.* Examining the Nootropic Effects of a special extract of *Bacopa monniera* on Human Cognitive Functioning: 90 day Double-Blind Placebo-Controlled Randomized Trial. *Phytotherapy research* **24**, 54-59, doi:10.1002/ptr (2008).
- 6 Barbhaiya, H. C. *et al.* Efficacy and tolerability of BacoMind on memory improvement in elderly participants -A double blind placebo controlled study. *Journal of Pharmacology and Toxicology* **3**, 425-434, doi:10.3923/jpt.2008.425.434 (2008).
- 7 Morgan, A. & Stevens, J. Does *Bacopa monnieri* Improve Memory Performance in Older Persons? Results of a Randomized, Placebo-Controlled, Double-Blind Trial.

*The Journal of Alternative and Complementary Medicine* **16**, 753-759,  
doi:10.1089/acm.2009.0342 (2010).

- 8 Mandal, A. K., Hedge, S. & Patki, P. S. A clinical study to evaluate the efficacy and safety of Bacopa caplets in memory and learning ability: A double blind placebo controlled study. *Australian Journal of Medical Herbalism* **23**, 122-125 (2011).
- 9 Peth-Nui, T. *et al.* Effects of 12-Week *Bacopa monnieri* Consumption on Attention, Cognitive Processing, Working Memory, and Functions of Both Cholinergic and Monoaminergic Systems in Healthy Elderly Volunteers. *Evidence-Based Complementary and Alternative Medicine* **2012**, 1-10, doi:10.1155/2012/606424 (2012).
- 10 Sathyanarayanan, V. *et al.* Brahmi for the better? New findings challenging cognition and anti-anxiety effects of Brahmi (*Bacopa monniera*) in healthy adults. *Psychopharmacology* **227**, 299-306, doi:10.1007/s00213-013-2978-z (2013).
- 11 Sadhu, A. *et al.* Management of Cognitive Determinants in Senile Dementia of Alzheimer's Type: Therapeutic Potential of a Novel Polyherbal Drug Product. *Clinical Drug Investigation* **34**, 857-869, doi:10.1007/s40261-014-0235-9 (2014).
- 12 Cicero, A. F. *et al.* Short-Term Impact of a Combined Nutraceutical on Cognitive Function, Perceived Stress and Depression in Young Elderly with Cognitive Impairment: A Pilot, Double-Blind, Randomized Clinical Trial. *The journal of prevention of Alzheimer's disease* **4**, 12-15, doi:10.14283/jpad.2016.10 (2017).
- 13 Zanotta, D., Puricelli, S. & Bonoldi, G. Cognitive effects of a dietary supplement made from extract of *Bacopa monnieri*, astaxanthin, phosphatidylserine, and vitamin E in subjects with mild cognitive impairment: A noncomparative, exploratory clinical study. *Neuropsychiatric Disease and Treatment* **10**, 225-230, doi:10.2147/NDT.S51092 (2014).
- 14 Goswami, S. *et al.* Effect of *Bacopa monnieri* on cognitive functions in Alzheimer's disease patients. *International Journal of Collaborative Research on Internal Medicine and Public Health* **3**, 285-293 (2011).

- 15 Micheli, L. *et al.* *Bacopa monnieri* as augmentation therapy in the treatment of anhedonia, preclinical and clinical evaluation. *Phytotherapy Research* **34**, 2331-2340, doi: 10.1002/ptr.6684 (2020).
- 16 Patel, R. B. Experience with Mentat in Hyperkinetic Children. *Probe* **3**, 271-274 (1991).
- 17 Kalra, V. & Kulkarni, K. S. A randomized double blind placebo-controlled drug trial with Mentat in children with Attention Deficit Hyperactivity Disorder. *Neurosciences Today* **4**, 223-227 (2002).
- 18 Nathan, P. J. *et al.* Effects of a combined extract of Ginkgo biloba and Bacopa monniera on cognitive function in healthy humans. *Human Psychopharmacology* **19**, 91-96, doi:10.1002/hup.544 (2004).
- 19 Pravina, K. *et al.* Safety evaluation of BacoMind™ in healthy volunteers: a phase I study. *Phytomedicine* **14**, 301-308 (2007).
- 20 Ojha, K., Kumar, A. & Rai, M. Clinical Study on the Role of an Ayurvedic. *Ayurveda* **1**, 39-47 (2007).
- 21 Raina, R. S. *et al.* The Psychomotor Effects Of Brahmi And Caffeine On Healthy Male Volunteers RAINA. *Journal Of Clinical and Diagnostic Research* **3**, 1827-1835, doi:10.1016/j.wem.2013.09.006 (2009).
- 22 Katz, M., Levine, A. A., Kol-Degani, H. & Kav-Venaki, L. A compound herbal preparation (CHP) in the treatment of children with ADHD: A randomized controlled trial. *Journal of Attention Disorders* **14**, 281-291, doi:10.1177/1087054709356388 (2010).
- 23 Dutta, B. *et al.* A study of evaluation of safety and efficacy of memomet, a multi herbal formulation (memomet) in the treatment of behavioural disorder in children. *International Journal of Research in Pharmaceutical Sciences* **3**, 282-286 (2012).
- 24 Benson, S. *et al.* Erratum: An acute, double-blind, placebo-controlled cross-over study of 320-mg and 640-mg doses of *Bacopa monnieri* (CDRI 08) on multitasking stress

reactivity and mood (Phytotherapy Research (2014) 28 (551-559) DOI: 10.1002/ptr.5029). *Phytotherapy Research* **29**, 1676-1676, doi:10.1002/ptr.5439 (2015).

25 Downey, L. A. *et al.* An acute, double-blind, placebo-controlled crossover study of 320 mg and 640 mg doses of a special extract of *Bacopa monnieri* (CDRI 08) on sustained cognitive performance. *Phytotherapy Research* **27**, 1407-1413, doi:10.1002/ptr.4864 (2013).

26 Dave, P. U., Dingankar, S. R. & Saxena, V. S. An Open-label Study to Elucidate the Effects of Standardized *Bacopa monnieri* Extract in the Management of Symptoms of Attention-deficit Hyperactivity Disorder in Children. *Advances* **28**, 10-15 (2014).
